# Supplementary material for: Enhanced photochromic performance of Zn-doped W18O49-based films for smart windows
Source: Royal Society of Chemistry journal article supplement (doi:10.1039/d4tc01445f), 2024-01-01
Supplement: d4tc01445f1.pdf [file d4tc01445f1.pdf]

## **Enhanced photochromic performance of Zn doped $W_{18}O_{49}$ - based films for smart windows**

Tingfeng Ma <sup>a</sup>, Bin Li <sup>a</sup>, YongKang Zhu <sup>a</sup>, Senwei Wu <sup>a</sup>, Xiujian Zhao <sup>a</sup>, Xinhong Chu  
<sup>b</sup>, Shouqin Tian<sup>\*,a</sup>

<sup>a</sup> State Key laboratory of Silicate Materials for Architectures, Wuhan University of  
Technology, No.122 Luoshi Road, Wuhan, 430070, P. R. China.

<sup>b</sup> College of Physics Science and Engineering Technology, Yichun University, Yichun  
336000, China

*\*Corresponding author: Shouqin Tian (E-mail: tiansq@whut.edu.cn)*

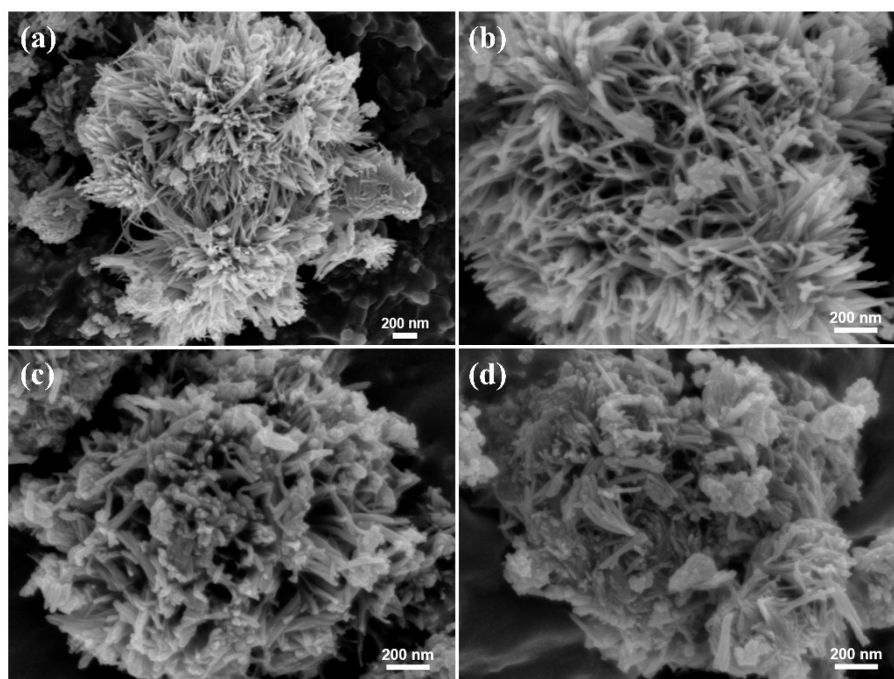

Fig. S1 (a) ~ (d) SEM images of Zn/W-0 ~ Zn/W-0.06 nanopowders, respectively.

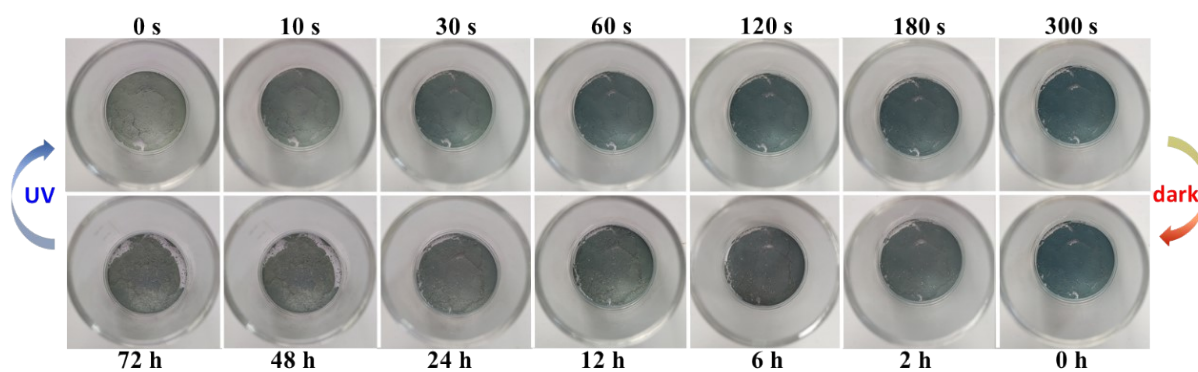

Fig. S2 Coloration of Zn/W-0 nanoparticles and bleaching process in dark at room temperature.

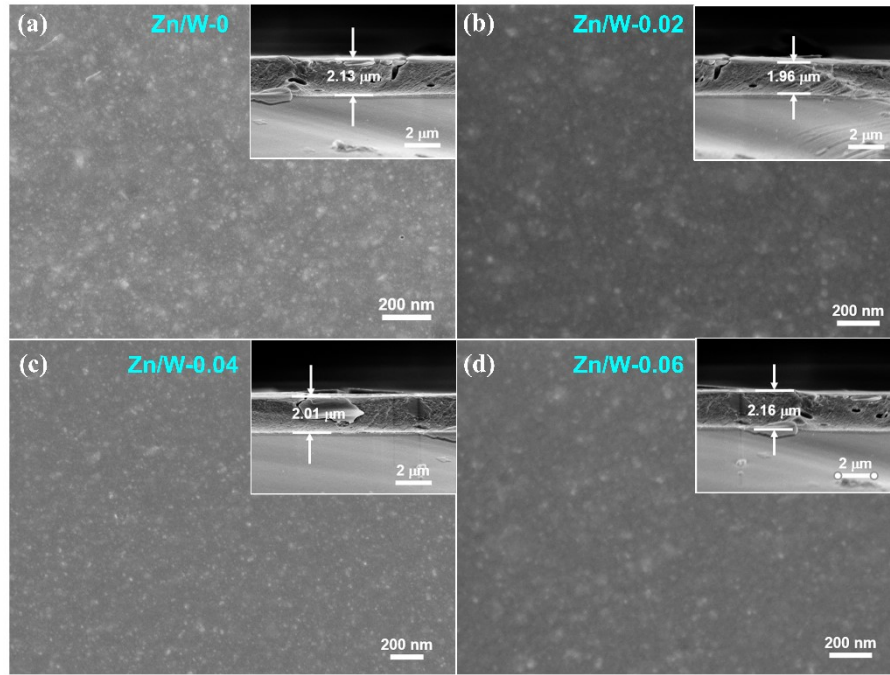

Fig. S3 (a-d) SEM images of Zn/W-0.02~Zn/W-0.06 films, the insets show the thickness of the films.

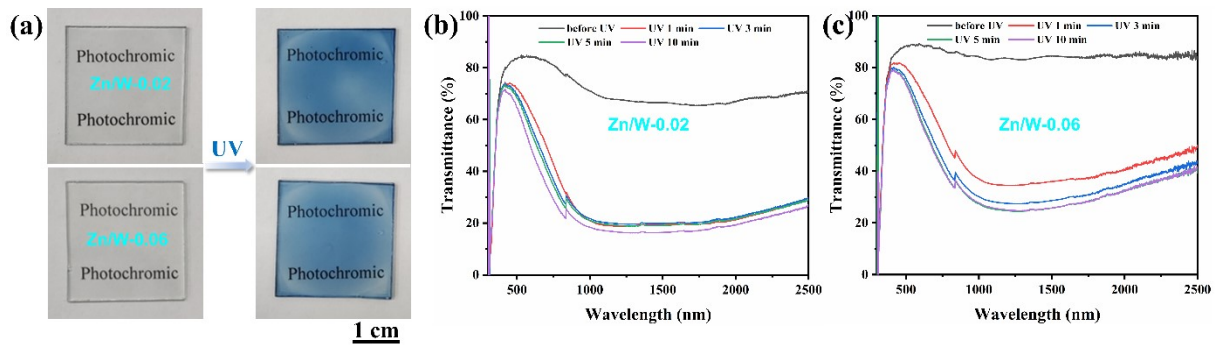

Fig. S4 (a) photochromic photographs, (b-c) transmittance spectra of Zn/W-0.02 and Zn/W-0.06 thin films after UV irradiation for different time.

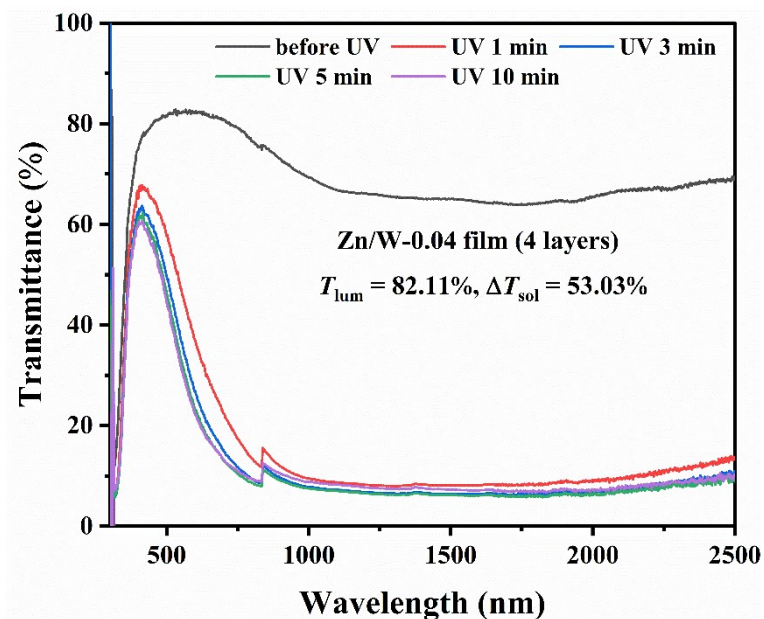

Fig. S5 Transmittance spectra of Zn/W-0.04 films (4 layers) irradiated with UV light for different times

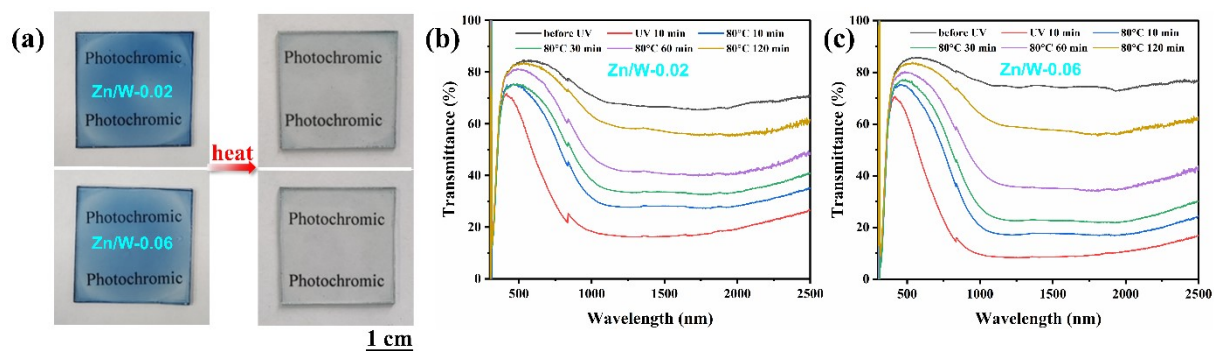

Fig. S6 (a) Faded photographs of Zn/W-0.02 and Zn/W-0.06 films, (b-c) transmittance spectra after in-situ heating at 80°C for different times.
